# Supplementary material
Source: PubMed Central journal article supplement (PMC4009708)

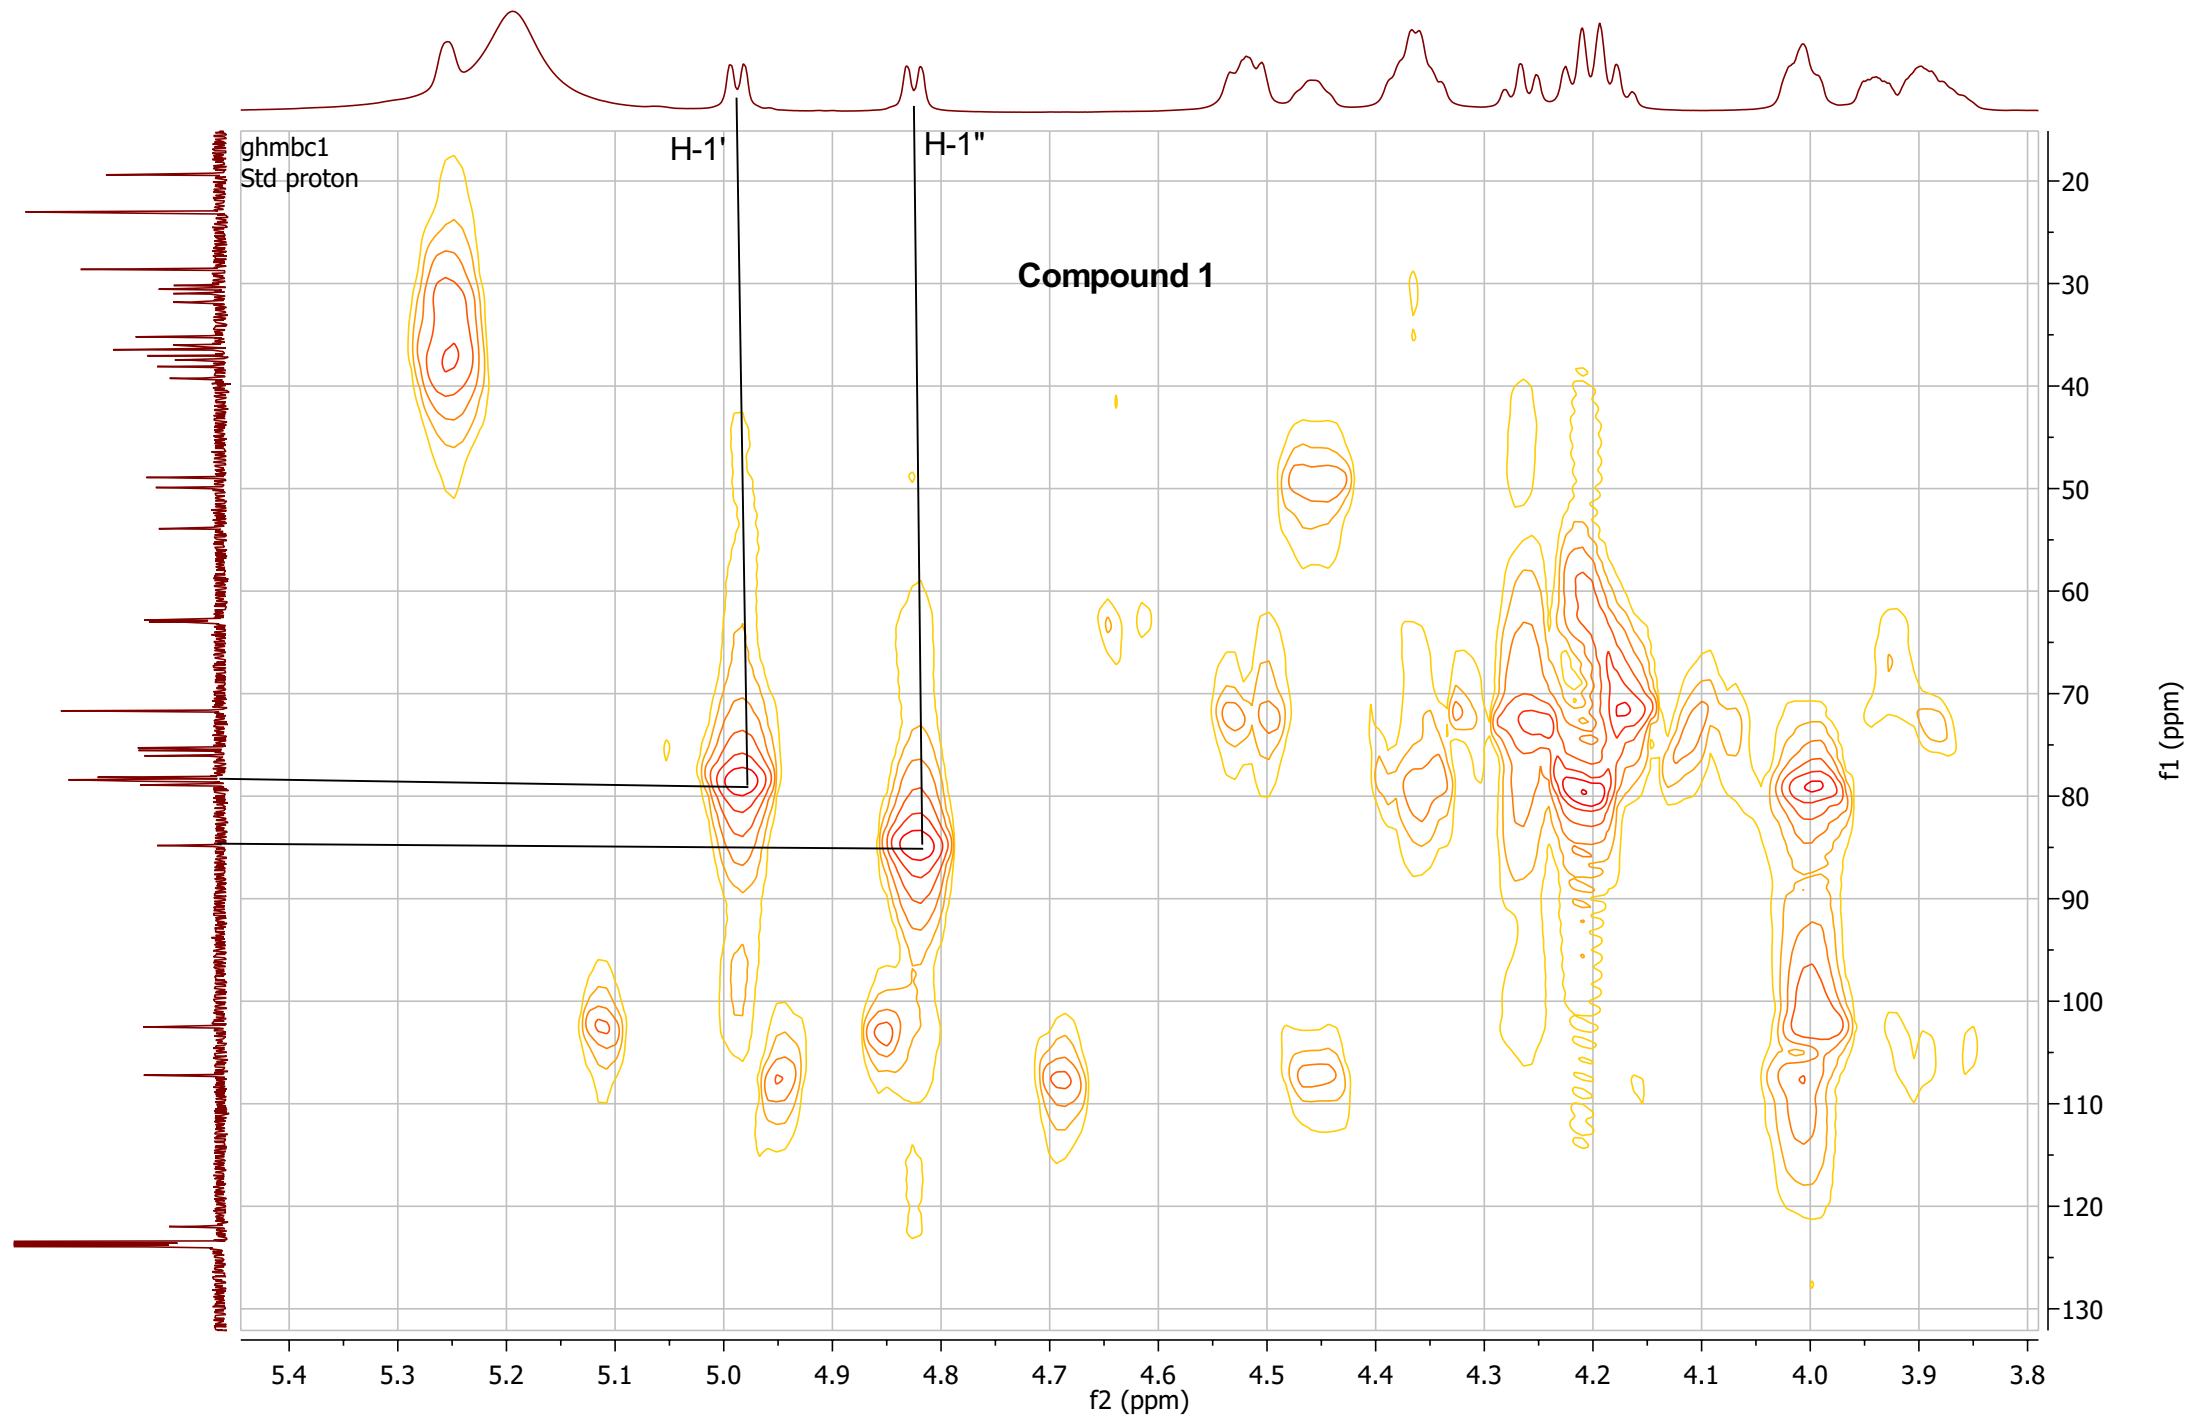

Supplement: NIHMS434537-supplement-01.pdf [file NIHMS434537-supplement-01.pdf]

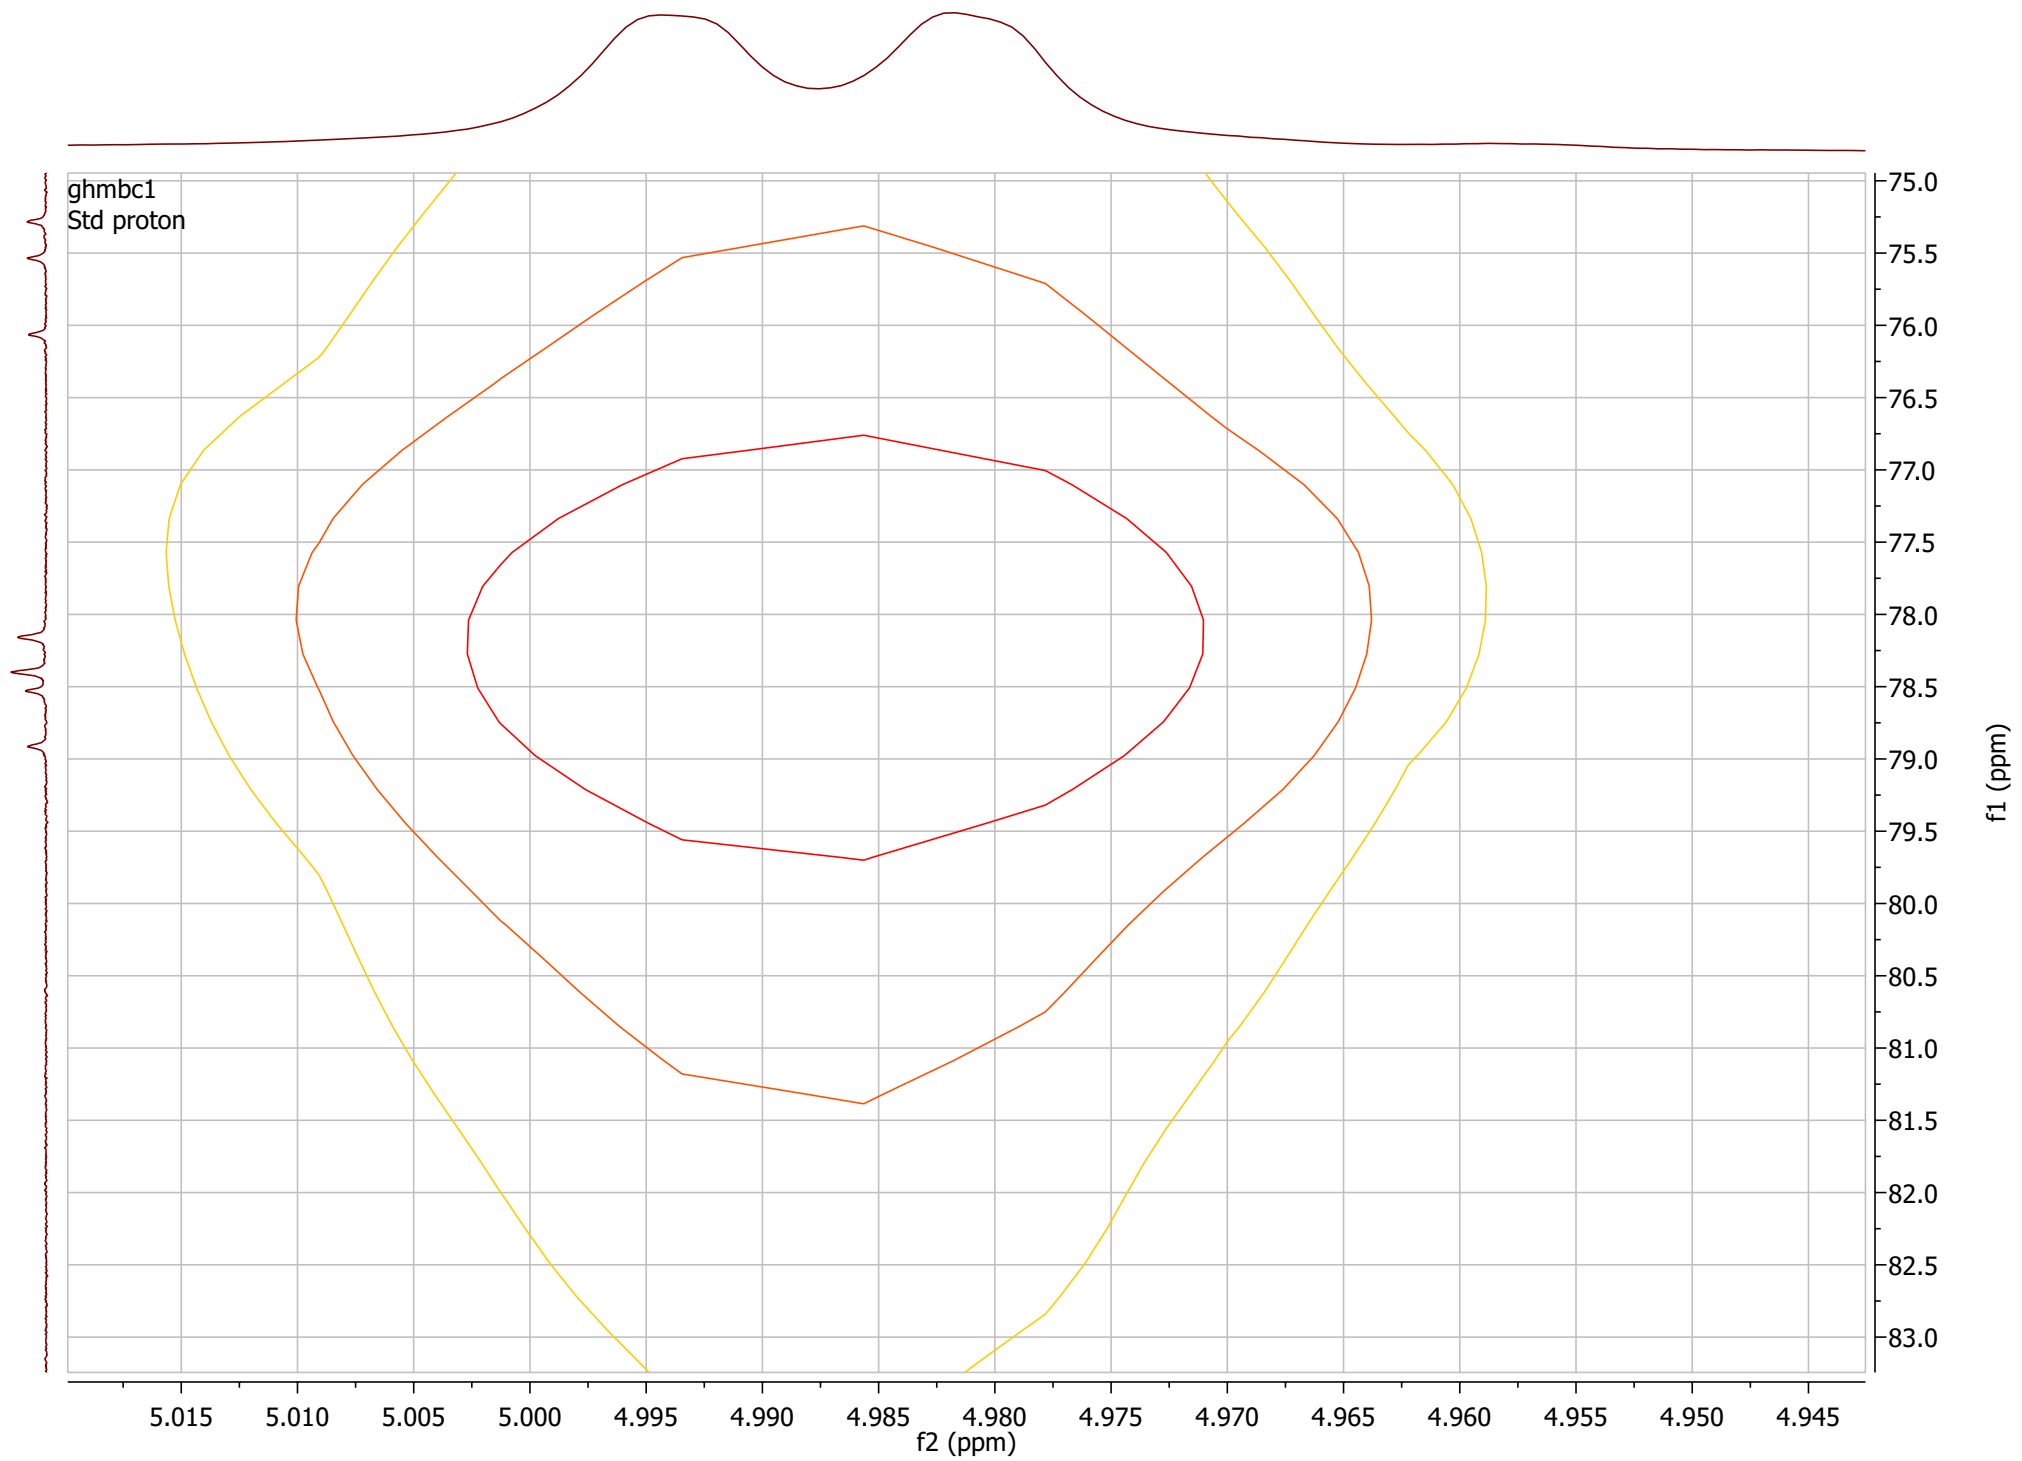

Supplement: NIHMS434537-supplement-02.pdf [file NIHMS434537-supplement-02.pdf]

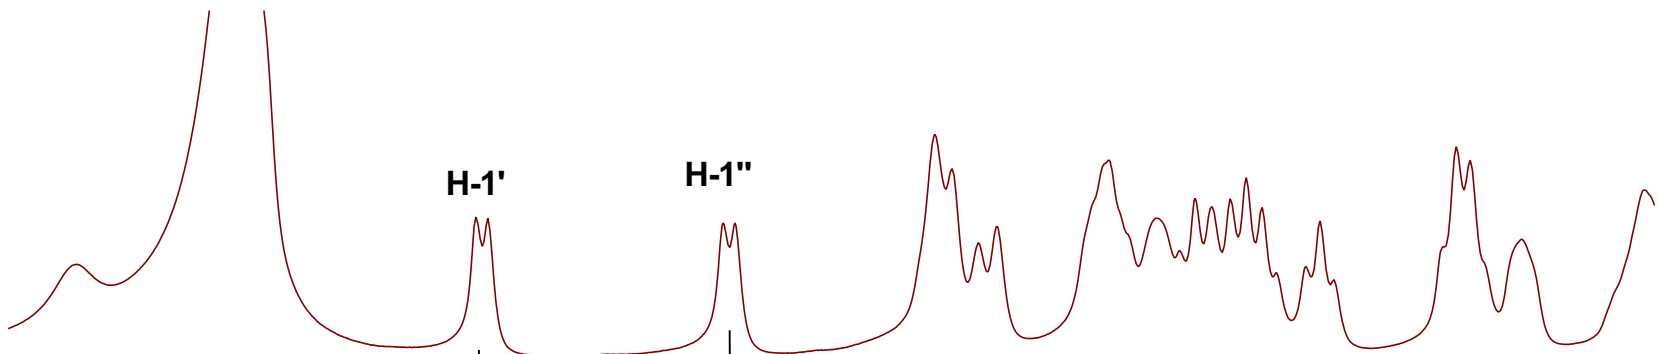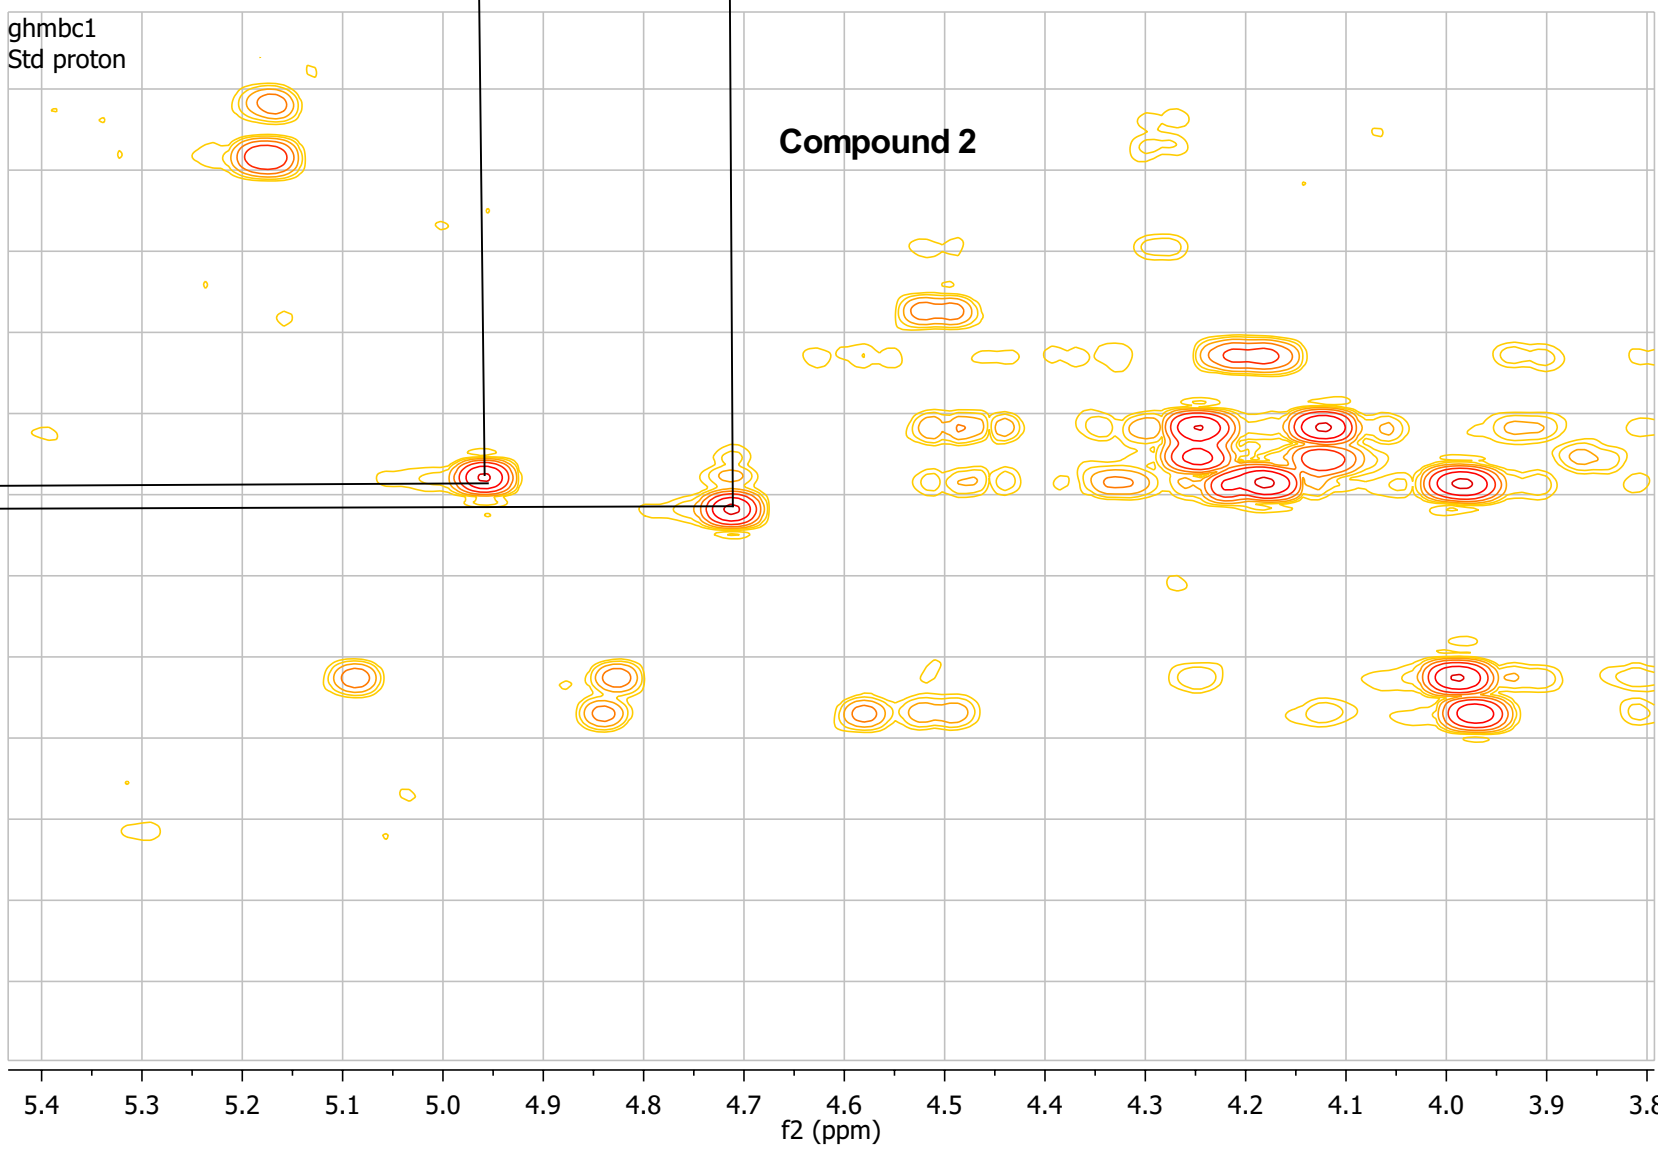

ghmbc1  
Std proton

Compound 2

H-1'

H-1''

f1 (ppm)

f2 (ppm)

Supplement: NIHMS434537-supplement-03.pdf [file NIHMS434537-supplement-03.pdf]

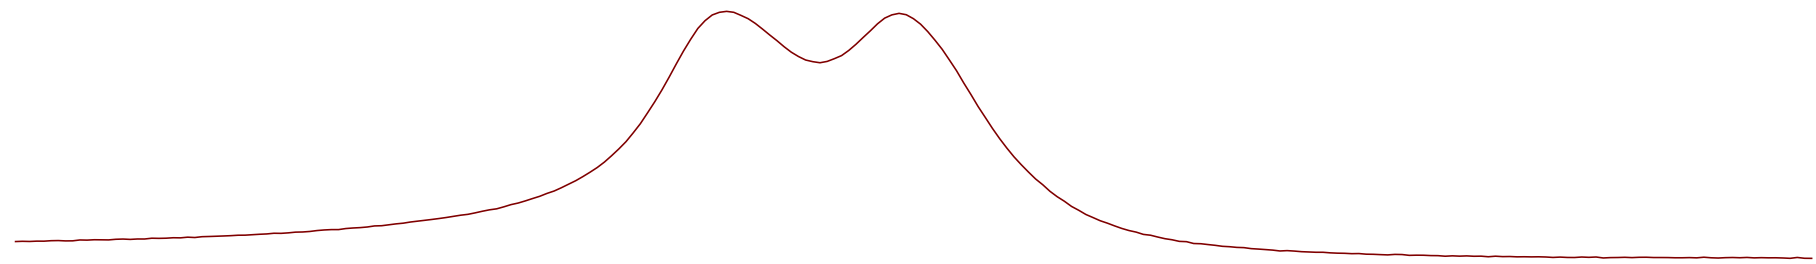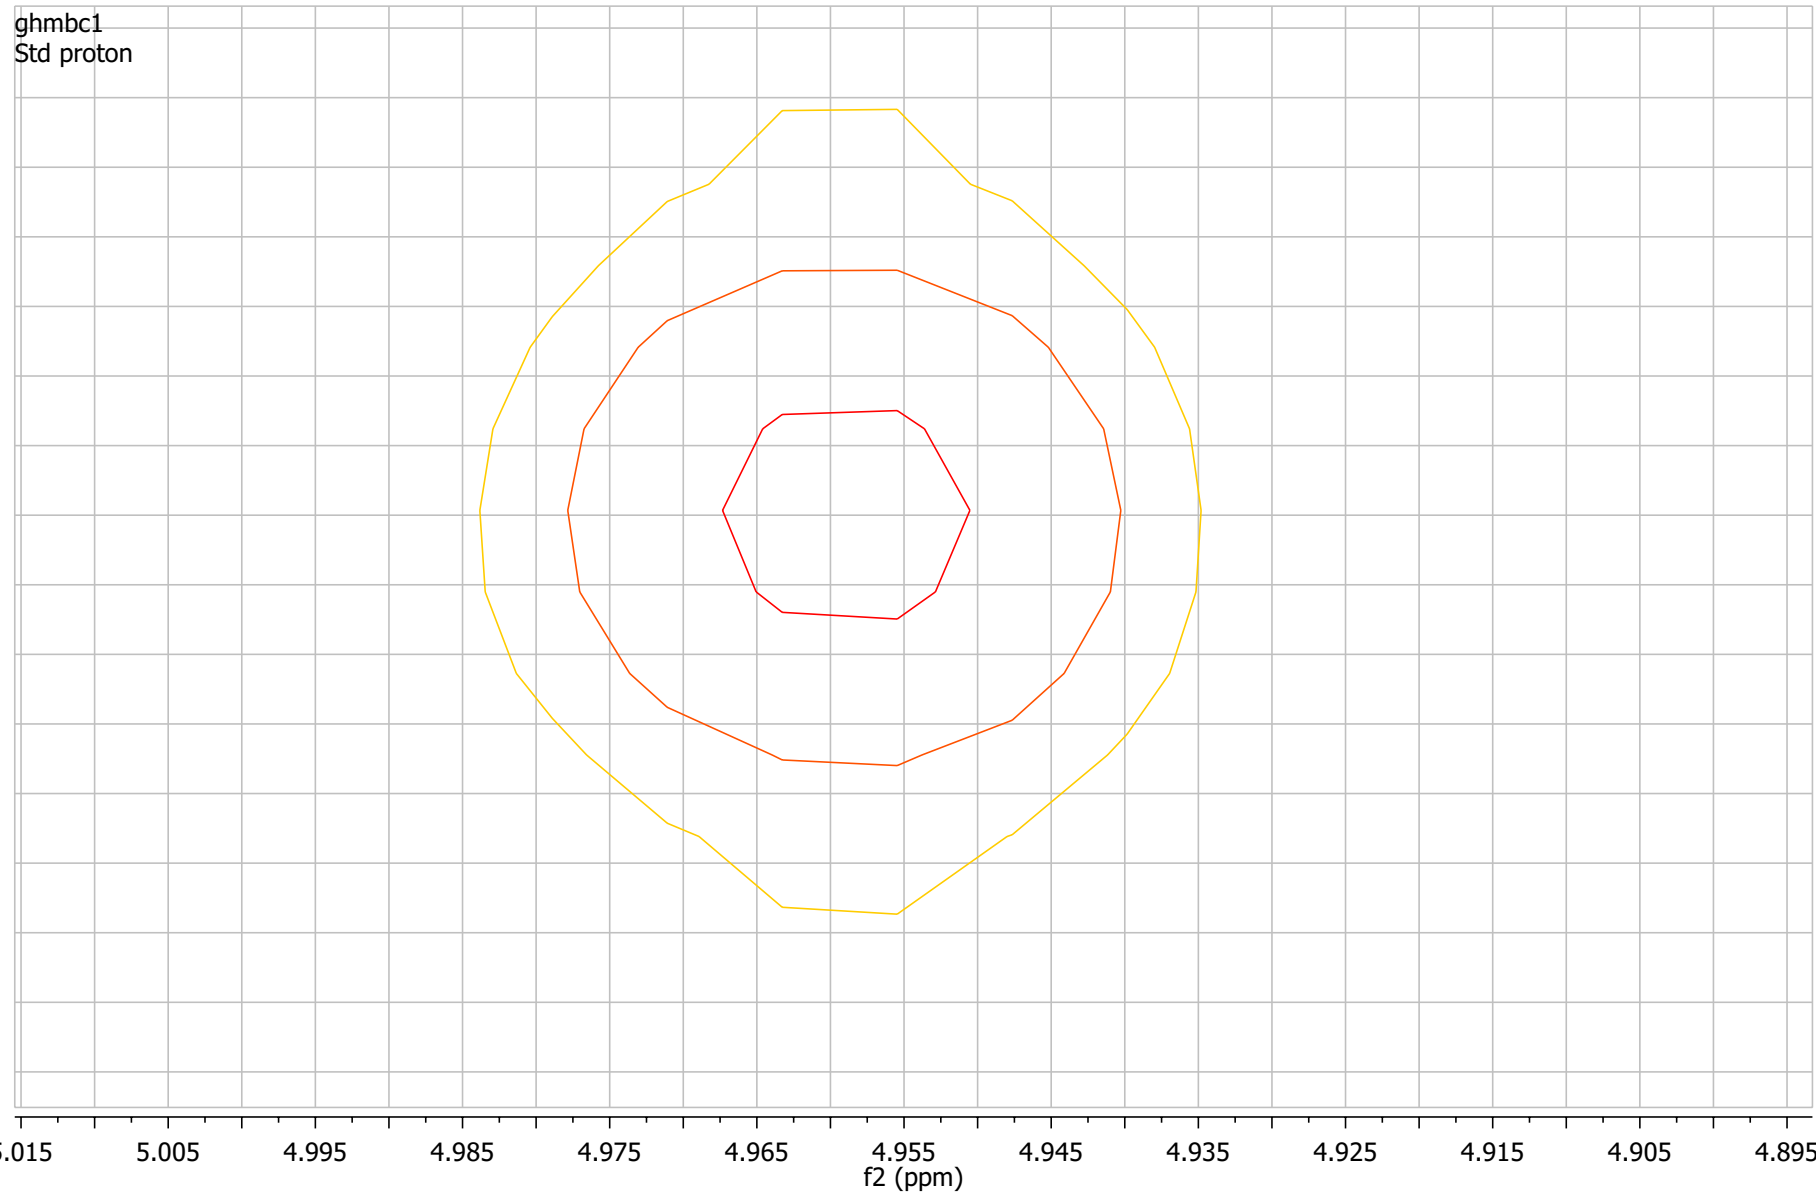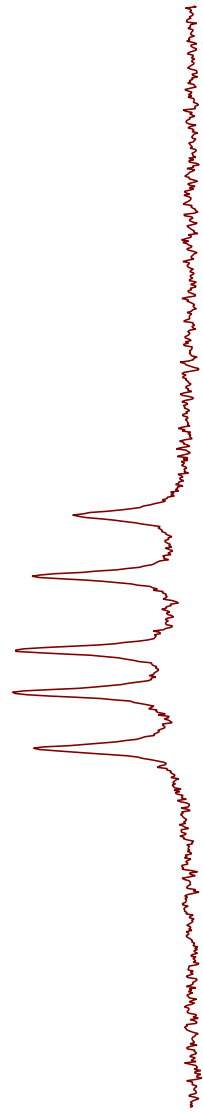

Supplement: NIHMS434537-supplement-04.pdf [file NIHMS434537-supplement-04.pdf]

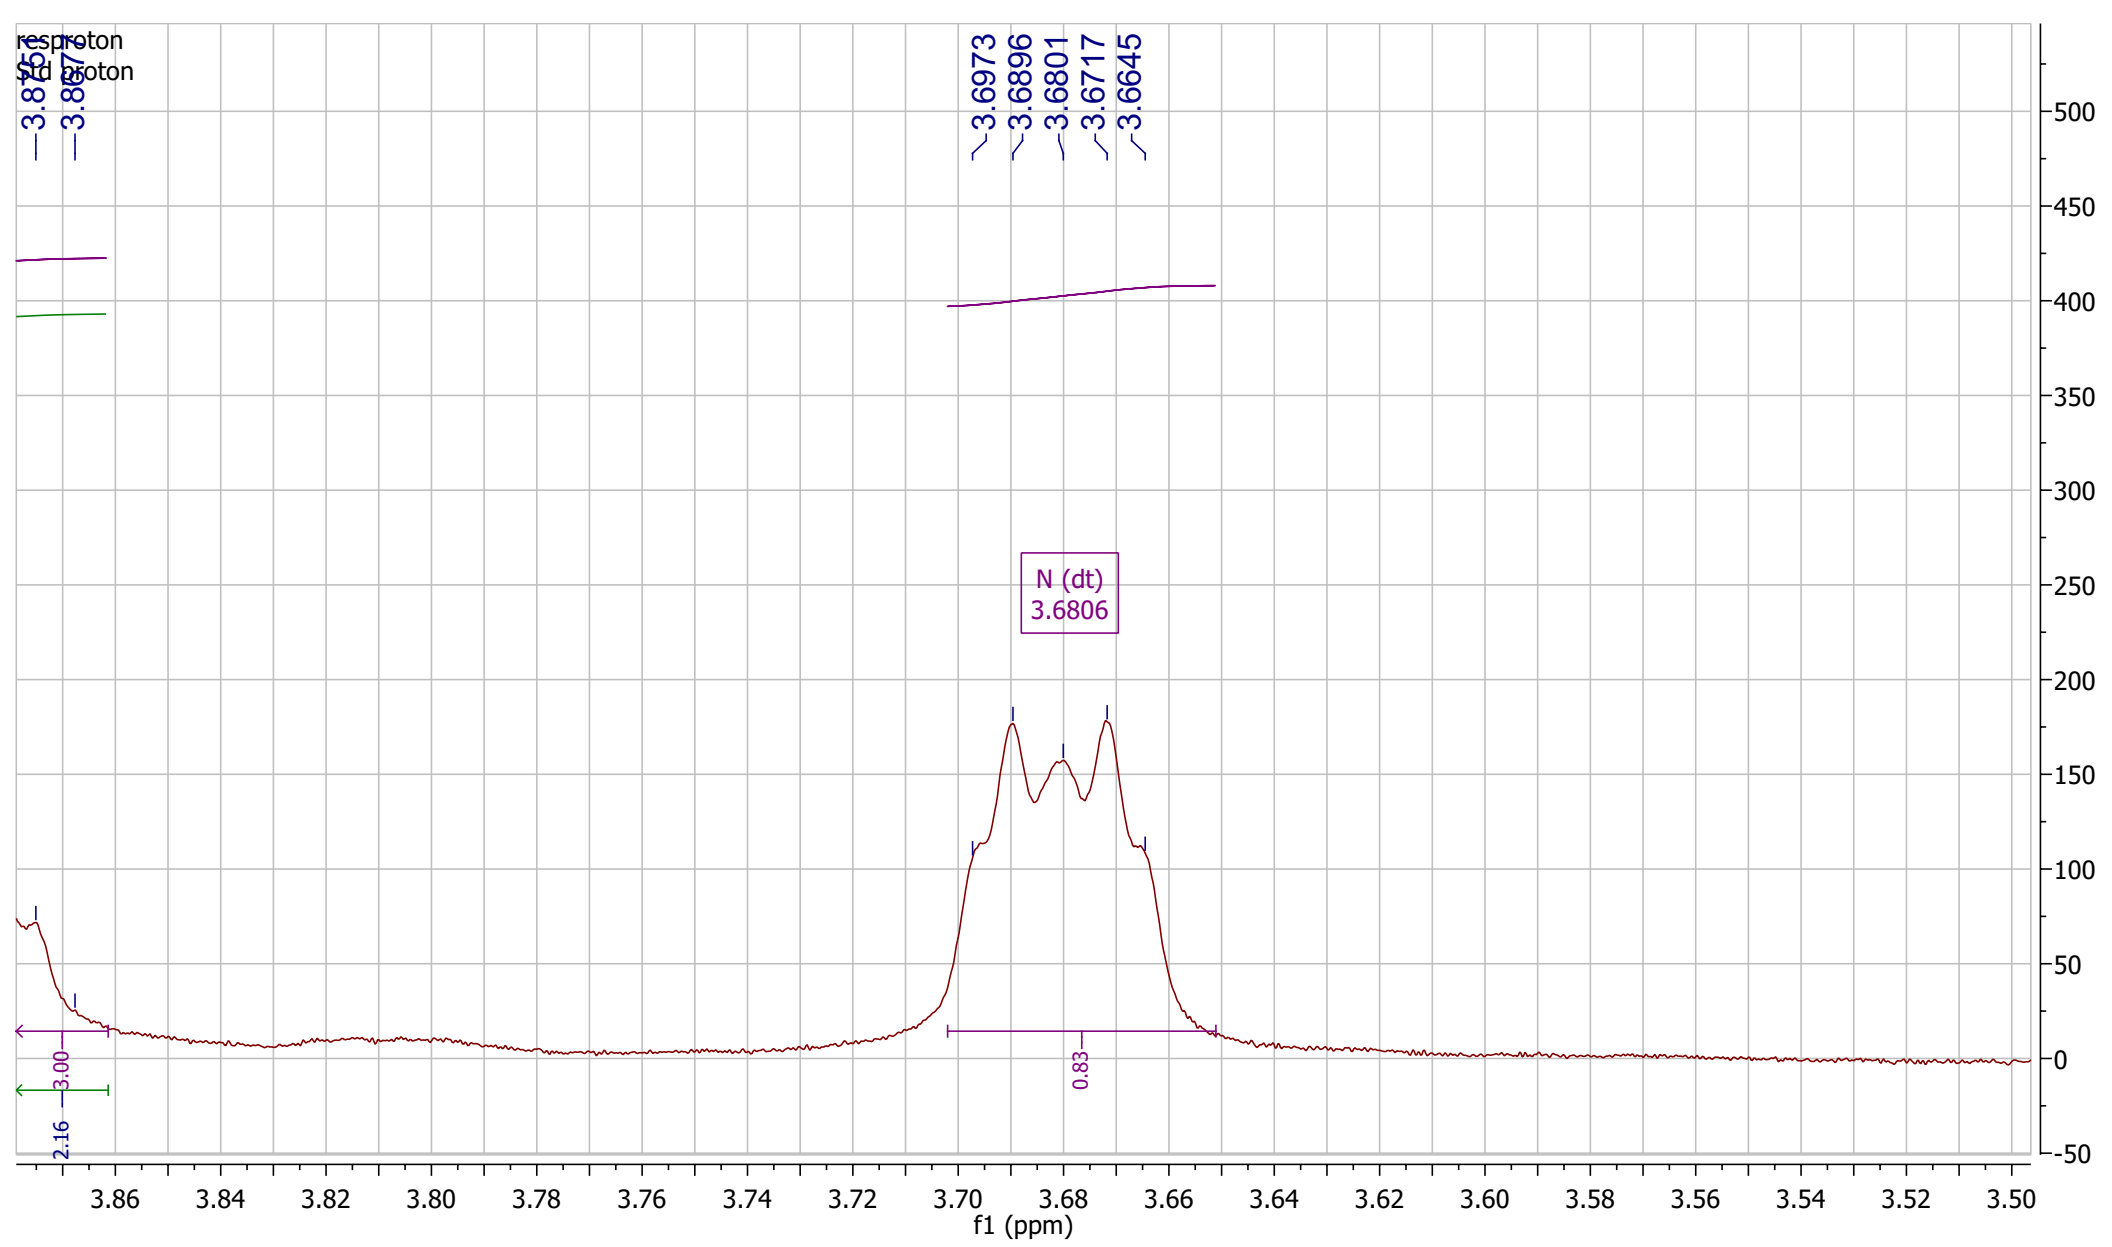

res proton  
d proton

3.875  
3.87

3.6973  
3.6896  
3.6801  
3.6717  
3.6645

N (dt)  
3.6806

2.16  
3.00

0.83

f1 (ppm)

500  
450  
400  
350  
300  
250  
200  
150  
100  
50  
0  
-50

Supplement: NIHMS434537-supplement-05.pdf [file NIHMS434537-supplement-05.pdf]

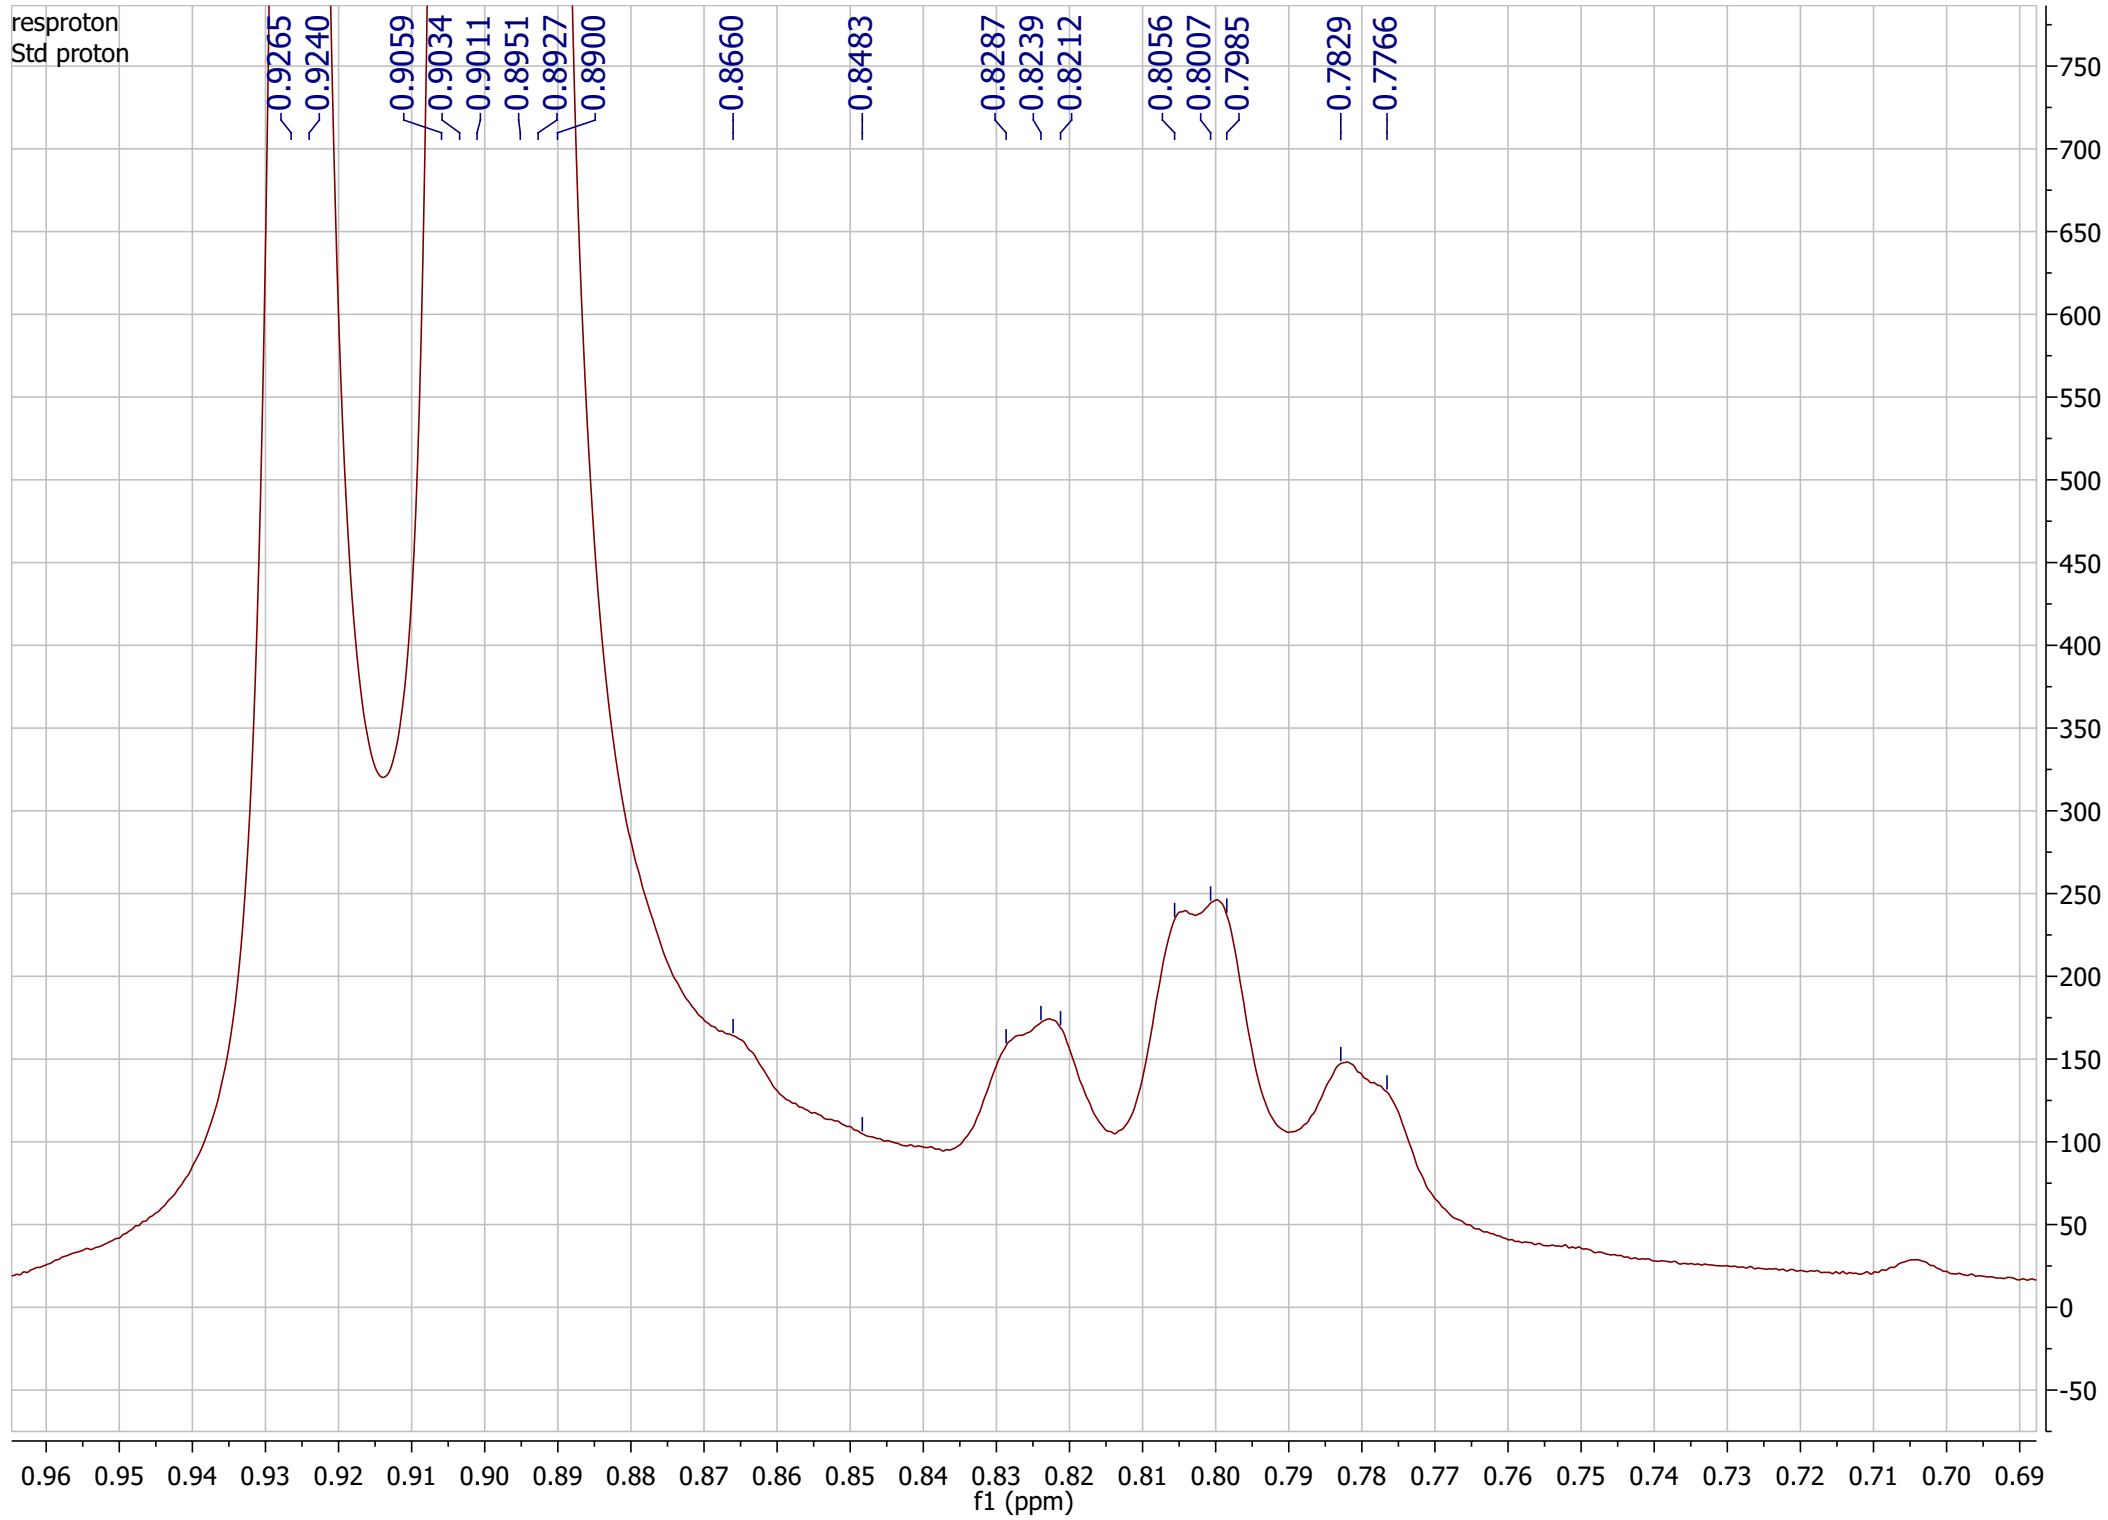

Supplement: NIHMS434537-supplement-06.pdf [file NIHMS434537-supplement-06.pdf]
